# Supplementary material for: Level of Trust of the Population in the Unified Health System in the Midst of the COVID-19 Crisis in Brazil
Source: Preprints.org preprint supplement (doi:10.20944/preprints202210.0110.v1), 2022-10-10
Supplement: Supplementary file 1 [file supplementary]

**Table 1.** Variables included in the present study

| **Variables** | **Categories** |
| --- | --- |
| **Independent Variables** | |
| Sex | Male, Female |
| Age | Continuous |
| Region | North, Northeast, Midwest, Southeast, South |
| Education Level | <=Elementary school, Complete primary education, High school, Graduate, and Postgraduate degree |
| Income | Less than 1 Minimum Wage, from 1 to 2 Minimum Wages, From 2 to 5 Minimum Wages, From 5 to 10 Minimum Wages, Above 10 Minimum Wages, Don’t Know/Prefer not to Inform |
| Skin color | White, Black/Brown, Yellow/Indigenous |
| Marital Status | Single, Married/Stable Union, Separated, Widowed |
| Religion | Catholic, Spiritism, Evangelical, Other Religions, No Religion |
| Occupation | Retired, Unemployed, Public employee, Private employee, Self-employed/Informal/Offers, Student, Other |
| Years of Residence | 0 to 10 years, >10 to 20 years, >20 to 30 years, > 30 years |
| Number of people living at home | Continuous |
| Number of people contributing to the family income | Continuous |
| Area of residence | Urban, Rural |
| Type of Housing | Own, Rented/Leased, Other |
| Health insurance | Yes, No |
| Use of SUS | Yes, No |
| Receives a visit from the community agent | Yes, No |
| Health clinic where he lives | Yes, No, I do not know |
| Aid from the government | Yes, No |
| **Sources of information** | |
| International Organizations | Yes, No |
| Friends and/or Family | Yes, No |
| Social Support Networks | Yes, No |
| News newspapers | Yes, No |

**Table 2.** Sociodemographic characteristics of the final study sample (N= 1,018).

| **Numerical variables** | **Mean** | **Standard deviation** |
| --- | --- | --- |
|  |  |  |
| **Age** | 46.1 | 14.8 |
| Residents at home | 2.8 | 1.7 |
| People who contribute to the family income | 1.8 | 0.8 |
|  |  |  |
| **Categorical variables** | **Frequency** | **%** |
| **Sex** |  |  |
| Male | 252 | 24.8 |
| Female | 766 | 75.2 |
| **Region** |  |  |
| Midwest | 43 | 4.2 |
| North East | 94 | 9.2 |
| North | 65 | 6.4 |
| Southeast | 672 | 66 |
| South | 144 | 14.1 |
| **Color/race** |  |  |
| Yellow/Indigenous | 21 | 2.1 |
| White | 708 | 69.5 |
| Black/brown | 289 | 28.4 |
| **Marital status** |  |  |
| Married/Stable union | 507 | 49.8 |
| Separated | 143 | 14 |
| Single | 351 | 34.5 |
| Windowed | 17 | 1.7 |
| **Religion** |  |  |
| Catholic | 389 | 38.2 |
| Spiritism | 122 | 12 |
| Evangelical | 114 | 11.2 |
| Other | 93 | 9.1 |
| No religion | 300 | 29.5 |
| **Occupation** |  |  |
| Retired | 141 | 13.9 |
| Autonomous/Informal/Offers | 97 | 9.5 |
| Unemployed | 46 | 4.5 |
| Private employee | 146 | 14.3 |
| Public employee | 385 | 37.8 |
| Student | 124 | 12.2 |
| Other | 79 | 7.8 |
| **Education** |  |  |
| Incomplete elementary school | 9 | 0.9 |
| Complete primary education | 16 | 1.6 |
| High school | 177 | 17.4 |
| Graduated | 260 | 25.5 |
| Postgraduate studies | 556 | 54.6 |
| **Income (in minimum wages)** |  |  |
| Less than 1 | 22 | 2.2 |
| 1 to 2 | 72 | 7.1 |
| 2 to 5 | 273 | 26.8 |
| 5 to 10 | 298 | 29.3 |
| More than 10 | 286 | 28.1 |
| Prefer not to inform/Do not know | 61 | 6 |
| No income | 6 | 0.6 |
| **Type of housing** |  |  |
| Own | 726 | 71.3 |
| Rent/Lease | 242 | 23.8 |
| Granted | 37 | 3.6 |
| Other | 13 | 1.3 |
| **Area of residence** |  |  |
| Rural | 30 | 2.9 |
| Urban | 988 | 97.1 |

**Table 3**. Characteristics of the final study sample: Social Thermometer (N= 1,018).

| **Categorical variables** | **Frequency** | **%** |
| --- | --- | --- |
| **Trust level in public health services to face COVID-19** |  |  |
| **Hospital** |  |  |
| Nothing trust | 74 | 7.3 |
| Little trust | 326 | 32 |
| Trust | 515 | 50.6 |
| Very trust | 103 | 10.1 |
| **Basic Health Unit/Health Center** |  |  |
| Nothing trust | 143 | 14 |
| Little trust | 421 | 41.4 |
| Trust | 396 | 38.9 |
| Very trust | 58 | 5.7 |

**Table 4.** Final models regarding the trust level toward hospital services (N=1,018).

|  | **Odds Ratio (OR)** | **95% CI** | **P-value** |
| --- | --- | --- | --- |
| **Sex** |  |  |  |
| Female (Ref) |  |  |  |
| Male | 1.36 | 1.02-1.81 | 0.0340 |
| **Region** |  |  |  |
| Southeast (Ref) |  |  |  |
| Midwest: 1 | 0.92 | 0.27-3.17 | 0.9032 |
| Midwest: 2 | 0.49 | 0.26-0.95 | 0.0357 |
| Midwest: 3 | 0.15 | 0.02-1.15 | 0.0689 |
| North East: 1 | 2.18 | 0.75-6.33 | 0.1483 |
| North East: 2 | 0.95 | 0.60-1.52 | 0.8589 |
| North East: 3 | 1,21 | 0.62-2.38 | 0.5665 |
| North: 1 | 0.52 | 0.22-1.20 | 0.1296 |
| North: 2 | 0.43 | 0.24-0.74 | 0.0027 |
| South: 1 | 3.18 | 1.11-9.11 | 0.0309 |
| South: 2 | 2.06 | 1.13-3.17 | 0.0010 |
| South: 3 | 0.90 | 0.49-1.65 | 0.7460 |
| **Age** | 0.97 | 0.96-0.98 | 0.0000 |
| **Religion** |  |  |  |
| Catholic (Ref) |  |  |  |
| Spiritist | 1.38 | 0.92-2.07 | 0.1162 |
| Evangelical | 0.65 | 0.43-0.98 | 0.0429 |
| Other | 0.68 | 0.44-1.07 | 0.1022 |
| No religion | 0.91 | 0.67-1.23 | 0.5562 |
| **Occupation** |  |  |  |
| Other (Ref) |  |  |  |
| Retired | 1.10 | 0.62-1.94 | 0.7363 |
| Autonomous | 1.24 | 0.70-2.20 | 0.4580 |
| Private Employee | 0.93 | 0.46-1.91 | 0.8616 |
| Public employee | 0.84 | 0.49-1.45 | 0.5519 |
| Student | 1.48 | 0.91-2.39 | 0.1085 |
| **Residential area** |  |  |  |
| Urban (Ref) |  |  |  |
| Rural | 0.45 | 0.22-0.91 | 0.0267 |
| **Sources of information to stay informed about COVID-19** |  |  |  |
| International Organization: No (REF) |  |  |  |
| International Organization: Yes | 1.41 | 1.09-1.82 | 0.0074 |
| **Education** |  |  |  |
| Graduated (Ref) |  |  |  |
| Elementary School | 3.05 | 1.29-7.22 | 0.0109 |
| High school | 1.15 | 0.77-1.71 | 0.4853 |
| Postgraduate studies | 1.32 | 0.98-1.78 | 0.0673 |
| **Income (in minimum wages)** |  |  |  |
| More than 10 (Ref) |  |  |  |
| 1 to 2 | 0.35 | 0.20-0.61 | 0.0003 |
| 2 to 5 | 0.69 | 0.49-0.98 | 0.0436 |
| 5 to 10 | 0.64 | 0.47-0.89 | 0.0089 |
| Less than 1 | 0.36 | 0.15-0.83 | 0.0178 |
| Prefer not to inform/Do not know | 0.65 | 0.37-1.12 | 0.1247 |

**Table 5.** Final models regarding the trust level toward the primary care service (N=1,018).

|  | **Odds Ratio (OR)** | **95% CI** | **P-value** |
| --- | --- | --- | --- |
| **Marital status** |  |  |  |
| Married (Ref) |  |  |  |
| Separated | 0.67 | 0.47-0.95 | 0.0274 |
| Single | 1.17 | 0.89-1.52 | 0.2417 |
| Windowed | 1.55 | 0.61-3.90 | 0.3503 |
| **Education** |  |  |  |
| Graduated (Ref) |  |  |  |
| Elementary School | 2.40 | 1.09-5.25 | 0.0283 |
| High school | 1.06 | 0.73-1.52 | 0.7484 |
| Postgraduate studies | 1.83 | 1.38-2.42 | 0.0000 |
| **Type of housing** |  |  |  |
| Own (Ref) |  |  |  |
| Rent/Lease | 1.45 | 1.10-1.92 | 0.0073 |
| Other | 1.51 | 0.88-2.60 | 0.1339 |
| **Sources of information used to stay informed about COVID-19** |  |  |  |
| International organizations: No (Ref) |  |  |  |
| International organizations: Yes: 1 | 1.35 | 1.06-1.72 | 0.0151 |
| Friends and/or family: No (Ref) |  |  |  |
| Friends and/or family: Yes: 3 | 1.32 | 1.02-1.70 | 0.0312 |
